# Supplementary material for: The new provisional WHO entity ‘RUNX1 mutated AML' shows specific genetics but no prognostic influence of dysplasia
Source: PubMed Central journal article supplement (PMC5056958; doi:10.1038/leu.2016.150), 2016-06-17
Supplement: leu2016150x1.pdf [file leu2016150x1.pdf]

## Supplemental Material

### The new provisional WHO entity “*RUNX1* mutated AML” shows specific genetics without prognostic influence of dysplasia

Torsten Haferlach,<sup>1</sup> Anna Stengel,<sup>1</sup> Sandra Eckstein,<sup>1</sup> Karolína Perglerová,<sup>2</sup> Tamara Alpermann,<sup>1</sup> Wolfgang Kern,<sup>1</sup> Claudia Haferlach,<sup>1</sup> Manja Meggendorfer<sup>1</sup>

<sup>1</sup>MLL Munich Leukemia Laboratory, Munich, Germany

<sup>2</sup>MLL2, Praha, Czech Republic

#### 1. Patients information

Bone marrow samples of all 152 patients were sent from different hematologic centers to the MLL Munich Leukemia Laboratory for diagnostics. Clinical characteristics as well as genetic information are given in Table S1 for the total *RUNX1* mutated AML cohort and differentiated by patients without and with MLD. Variants of unknown significance were excluded from statistical analyses and are therefore not listed in the table.

**Table S1.** Patients clinical characteristics, cytogenetics, and gene mutations.

| Parameter<br>(available cases n)             | Patient numbers (% or ranges) |                       |                    |
|----------------------------------------------|-------------------------------|-----------------------|--------------------|
|                                              | total cohort<br>(n=152)       | no MLD<br>(n=98, 64%) | MLD<br>(n=54, 36%) |
| Clinical characteristics (n=152)             |                               |                       |                    |
| male/female (ratio)                          | 103/49 (2.1)                  | 64/34 (1.9)           | 39/15 (2.6)        |
| median age (years)                           | 67 (18-87)                    | 67 (18-85)            | 66 (26-87)         |
| median WBC count (x10 <sup>3</sup> /μl)      | 4.4 (0.4-211.8)               | 4.5 (0.6-196.0)       | 4.2 (0.4-211.8)    |
| median platelet count (x10 <sup>3</sup> /μl) | 80 (10-428)                   | 78 (10-428)           | 90 (10-292)        |
| median Hb level (g/dl)                       | 8.9 (4.5-14.2)                | 8.9 (4.5-14.2)        | 8.9 (4.9-12.3)     |
| bone marrow blasts (%)                       | 59 (7-96)                     | 63 (21-96)            | 40 (7-90)          |
| Cytogenetics (n=152)                         |                               |                       |                    |
| normal karyotype                             | 93 (61%)                      | 57 (58%)              | 36 (67%)           |
| aberrant karyotype                           | 59 (39%)                      | 41 (42%)              | 18 (33%)           |
| trisomy 8                                    | 17 (11%)                      | 11 (27%)              | 6 (33%)            |
| trisomy 13                                   | 13 (9%)                       | 12 (29%)              | 1 (5.5%)           |
| trisomy 11                                   | 4 (3%)                        | 2 (5%)                | 2 (11%)            |
| trisomy 14                                   | 4 (3%)                        | 1 (2%)                | 3 (17%)            |
| other trisomies                              | 4 (3%)                        | 3 (7%)                | 1 (5.5%)           |
| other aberrations                            | 17 (11%)                      | 12 (29%)              | 5 (28%)            |

| Molecular mutations (n=140)                                 |            |           |           |
|-------------------------------------------------------------|------------|-----------|-----------|
| <i>ASXL1</i>                                                |            |           |           |
| mutated                                                     | 57 (41%)   | 33 (37%)  | 24 (47%)  |
| wild type                                                   | 83 (59%)   | 56 (63%)  | 27 (53%)  |
| <i>BCOR</i>                                                 |            |           |           |
| mutated                                                     | 29 (21%)   | 21 (24%)  | 8 (16%)   |
| wild type                                                   | 109 (79%)  | 66 (76%)  | 43 (84%)  |
| <i>CBL</i>                                                  |            |           |           |
| mutated                                                     | 1 (1%)     | 1 (1%)    | 0 (0%)    |
| wild type                                                   | 136 (99%)  | 86 (99%)  | 50 (100%) |
| <i>CEBPA</i>                                                |            |           |           |
| mutated (all single mutated)                                | 7 (5%)     | 4 (5%)    | 3 (6%)    |
| wild type                                                   | 132 (95%)  | 84 (95%)  | 48 (94%)  |
| <i>DNMT3A</i>                                               |            |           |           |
| mutated                                                     | 19 (14%)   | 12 (14%)  | 7 (14%)   |
| wild type                                                   | 115 (86%)  | 73 (86%)  | 42 (86%)  |
| <i>ETV6</i>                                                 |            |           |           |
| mutated                                                     | 3 (2%)     | 3 (3%)    | 0 (0%)    |
| wild type                                                   | 135 (98%)  | 84 (97%)  | 51 (100%) |
| <i>EZH2</i>                                                 |            |           |           |
| mutated                                                     | 6 (5%)     | 4 (5%)    | 2 (4%)    |
| wild type                                                   | 128 (95%)  | 84 (96%)  | 44 (96%)  |
| <i>FLT3</i> (p.Asp835 and internal tandem duplication, ITD) |            |           |           |
| mutated                                                     | 31 (22%)   | 21 (24%)  | 10 (20%)  |
| wild type                                                   | 109 (78%)  | 68 (76%)  | 41 (80%)  |
| <i>GATA2</i>                                                |            |           |           |
| mutated                                                     | 1 (1%)     | 1 (1%)    | 0 (0%)    |
| wild type                                                   | 138 (99%)  | 88 (99%)  | 50 (100%) |
| <i>IDH1</i>                                                 |            |           |           |
| mutated                                                     | 13 (9%)    | 9 (10%)   | 4 (8%)    |
| wild type                                                   | 127 (91%)  | 80 (90%)  | 47 (92%)  |
| <i>IDH2</i>                                                 |            |           |           |
| mutated                                                     | 24 (17%)   | 20 (22%)  | 4 (8%)    |
| wild type                                                   | 116 (83%)  | 69 (78%)  | 47 (92%)  |
| <i>KIT</i>                                                  |            |           |           |
| mutated                                                     | 4 (3%)     | 0 (0%)    | 4 (8%)    |
| wild type                                                   | 136 (97%)  | 89 (100%) | 47 (92%)  |
| <i>KRAS</i>                                                 |            |           |           |
| mutated                                                     | 6 (4%)     | 4 (5%)    | 2 (4%)    |
| wild type                                                   | 134 (96%)  | 85 (95%)  | 49 (96%)  |
| <i>MLL-PTD</i>                                              |            |           |           |
| mutated                                                     | 19 (14%)   | 10 (11%)  | 9 (18%)   |
| wild type                                                   | 121 (86%)  | 79 (89%)  | 42 (82%)  |
| <i>NPM1</i>                                                 |            |           |           |
| mutated                                                     | 0 (0%)     | 0 (0%)    | 0 (0%)    |
| wild type                                                   | 140 (100%) | 89 (100%) | 51 (100%) |
| <i>NRAS</i>                                                 |            |           |           |
| mutated                                                     | 18 (13%)   | 9 (10%)   | 9 (18%)   |
| wild type                                                   | 122 (87%)  | 89 (90%)  | 42 (82%)  |
| <i>SETBP1</i>                                               |            |           |           |
| mutated                                                     | 3 (2%)     | 2 (2%)    | 1 (2%)    |
| wild type                                                   | 137 (98%)  | 87 (98%)  | 50 (98%)  |

|              |           |          |           |
|--------------|-----------|----------|-----------|
| <i>SF3B1</i> |           |          |           |
| mutated      | 13 (9%)   | 10 (11%) | 3 (6%)    |
| wild type    | 126 (91%) | 78 (89%) | 48 (94%)  |
| <i>SRSF2</i> |           |          |           |
| mutated      | 51 (36%)  | 31 (35%) | 20 (39%)  |
| wild type    | 89 (64%)  | 58 (65%) | 31 (61%)  |
| <i>TET2</i>  |           |          |           |
| mutated      | 24 (18%)  | 11 (13%) | 13 (27%)  |
| wild type    | 109 (82%) | 73 (87%) | 36 (73%)  |
| <i>TP53</i>  |           |          |           |
| mutated      | 2 (1%)    | 2 (2%)   | 0 (0%)    |
| wild type    | 138 (99%) | 87 (98%) | 51 (100%) |
| <i>U2AF1</i> |           |          |           |
| mutated      | 22 (16%)  | 12 (14%) | 10 (20%)  |
| wild type    | 118 (84%) | 77 (86%) | 41 (80%)  |
| <i>WT1</i>   |           |          |           |
| mutated      | 17 (12%)  | 12 (14%) | 5 (10%)   |
| wild type    | 122 (88%) | 76 (86%) | 46 (90%)  |
| <i>ZRSR2</i> |           |          |           |
| mutated      | 3 (2%)    | 1 (1%)   | 2 (4%)    |
| wild type    | 133 (98%) | 86 (99%) | 47 (96%)  |

## 2. Cytomorphology

All samples underwent May-Grünwald-Giemsa staining and cytochemistry (myeloperoxidase and nonspecific esterase). Dysplasia was assessed in granulopoiesis, erythropoiesis, and megakaryopoiesis according to Goasguen *et al.*<sup>1</sup> MLD was defined by  $\geq 50\%$  dysplastic cells in  $\geq 2$  lineages following the WHO guidelines.<sup>2, 3</sup> In 20 of 152 patients, only 2 hematopoietic lineages were evaluable, but patients could be defined as MLD<sup>+</sup> in cases showing 2 dysplastic lineages or as MLD<sup>-</sup> if 2 lineages were without dysplasia in 50% of cells. Therefore, all 152 patients were evaluable for MLD, while only 132 were evaluable for megakaryopoietic dysplasia.

## 3. Next generation sequencing

140/152 samples were investigated by a next generation sequencing (NGS) approach based on library preparation by the Access Array technology (Fluidigm, San Francisco, CA) and sequencing on the MiSeq Instrument (Illumina, San Diego, CA). The customized sequencing panel targeted 217 amplicons covering the hotspot or complete coding regions of the following 24 genes: *ASXL1*, *BCOR*, *CBL*, *CEBPA*, *DNMT3A*, *ETV6*, *EZH2*, *FLT3*, *GATA2*,

*IDH1*, *IDH2*, *KIT*, *KRAS*, *NPM1*, *NRAS*, *RUNX1*, *SETBP1*, *SF3B1*, *SRSF2*, *TET2*, *TP53*, *U2AF1*, *WT1*, *ZRSR2*. Gene mutations were annotated compared to the reference sequence based on the Ensembl Transcript ID (Ensembl release 74: Dec 2013). The transcript IDs as well as the targeted gene regions are given in Table S2.

**Table S2:** Targeted exons and transcript ID of the reference sequence for all by NGS investigated genes.

| Gene          | Sequenced exons        | Transcript ID   |
|---------------|------------------------|-----------------|
| <i>ASXL1</i>  | E13                    | ENST00000375687 |
| <i>BCOR</i>   | complete coding region | ENST00000378444 |
| <i>CBL</i>    | E8, E9                 | ENST00000264033 |
| <i>CEBPA</i>  | complete coding region | ENST00000498907 |
| <i>DNMT3A</i> | E7 - E23               | ENST00000264709 |
| <i>ETV6</i>   | complete coding region | ENST00000396373 |
| <i>EZH2</i>   | complete coding region | ENST00000320356 |
| <i>FLT3</i>   | E20                    | ENST00000241453 |
| <i>GATA2</i>  | complete coding region | ENST00000341105 |
| <i>IDH1</i>   | E4                     | ENST00000345146 |
| <i>IDH2</i>   | E4                     | ENST00000330062 |
| <i>KIT</i>    | E17                    | ENST00000288135 |
| <i>KRAS</i>   | E2, E3                 | ENST00000256078 |
| <i>NPM1</i>   | E11                    | ENST00000296930 |
| <i>NRAS</i>   | E2, E3                 | ENST00000369535 |
| <i>RUNX1</i>  | complete coding region | ENST00000344691 |
| <i>SETBP1</i> | E4                     | ENST00000282030 |
| <i>SF3B1</i>  | E11 - E16              | ENST00000335508 |
| <i>SRSF2</i>  | E1                     | ENST00000392485 |
| <i>TET2</i>   | complete coding region | ENST00000380013 |
| <i>TP53</i>   | E4 - E11               | ENST00000269305 |
| <i>U2AF1</i>  | E2, E6                 | ENST00000291552 |
| <i>WT1</i>    | E7, E9                 | ENST00000332351 |
| <i>ZRSR2</i>  | complete coding region | ENST00000307771 |

#### 4. *MLL*-PTD and *FLT3*-ITD analyses

The partial tandem duplication (PTD) in the *MLL* gene was analyzed by quantitative PCR as described elsewhere.<sup>4</sup> The internal tandem duplication (ITD) in the *FLT3* gene was analyzed by fragment length analysis as described previously.<sup>5</sup>

#### 5. Comparison of FAB subtypes to AML control cohort

For the comparison of the FAB subtype distribution within the *RUNX1* mutated cohort and a general AML cohort (*MLL* data set) we built a matched control cohort. This control cohort was selected from AML patients at diagnosis, intermediate cytogenetic MRC<sup>6</sup> class 2,

comparable therapy regime, and *RUNX1* wild type status (n=886). The control cohort comprised of 438 male and 448 female, the median age was 63 years (range: 18-88 years). The FAB classification<sup>7</sup> for both cohorts is given in Table S3.

**Table S3.** Comparison of FAB classification between *RUNX1* mutated AML and AML control cohort (MLL data set).

| FAB classification | <i>RUNX1</i> mutated AML | AML control cohort* | <i>p</i> |
|--------------------|--------------------------|---------------------|----------|
| M0                 | 20% (31/152)             | 2% (21/886)         | <0.001   |
| M1                 | 30 % (45/152)            | 36% (315/886)       | n.s.     |
| M2                 | 42% (64/152)             | 33% (292/886)       | 0.033    |
| M3                 | 0% (0/152)               | 0% (1/886)          | n.s.     |
| M4                 | 6% (9/152)               | 21% (187/886)       | <0.001   |
| M5                 | 0% (0/152)               | 5% (47/886)         | 0.001    |
| M6                 | 2% (3/152)               | 2% (21/886)         | n.s.     |
| M7                 | 0% (0/152)               | 0% (2/886)          | n.s.     |

n.s.: not significant. \* taken from MLL data set.

## 6. Comparison of MLD and TLD to other AML studies

All 152 patients were assessed for MLD. MLD was defined by  $\geq 50\%$  dysplastic cells in  $\geq 2$  lineages following the WHO guidelines. We compared our results to a number of large AML studies where MLD and TLD were addressed (TLD, trilineage dysplasia are also included in MLD). The percentage of patients with MLD and TLD are given in Table S4.

**Table S4.** Comparison of MLD and TLD to large published AML cohorts.

| Study                               | Cohort                   | MLD | TLD |
|-------------------------------------|--------------------------|-----|-----|
| Haferlach <i>et al</i> <sup>8</sup> | AML                      | 25% | 15% |
| Miesner <i>et al</i> <sup>9</sup>   | AML                      | 36% | 9%  |
| Wandt <i>et al</i> <sup>10</sup>    | AML                      | 30% | 9%  |
| Bacher <i>et al</i> <sup>11</sup>   | <i>CEBPA</i> mutated AML | 26% | 2%  |
| Falini <i>et al</i> <sup>12</sup>   | <i>NPM1</i> mutated AML  | 23% | 5%  |
| Present study                       | <i>RUNX1</i> mutated AML | 36% | 8%  |

MLD: multilineage dysplasia. TLD: trilineage dysplasia.

## 7. *RUNX1* mutations in relation to MLD

The *RUNX1* protein is encoded by six exons, 453 amino acids, and three main functional domains: the Runt domain, the transcription activation domain, and the transcription inhibition domain. The majority of patients harbored one *RUNX1* mutation (n=123; 81%),

while 29 (19%) showed two mutations within the *RUNX1* gene. Mutations in the *RUNX1* gene are distributed all over the coding sequence. For comparison of mutation type and localization in no MLD and MLD cases, the mutations are plotted separately (Figure S1). There are no differences detectable between these two groups.

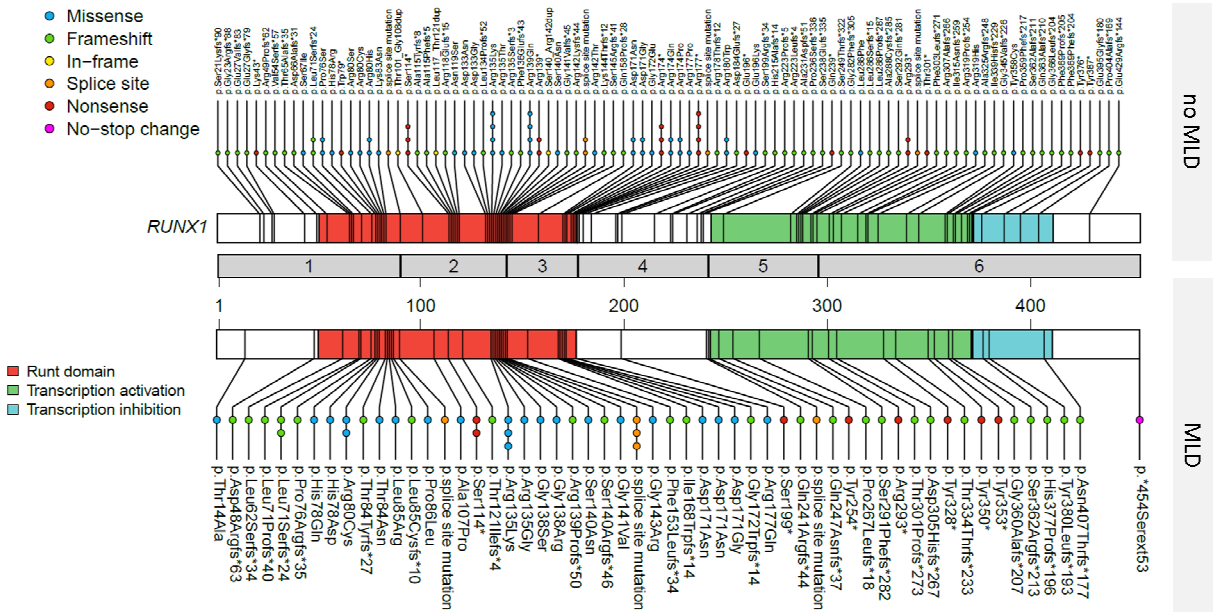

**Figure S1.** Mutation types and location within the *RUNX1* gene. Every single mutation is plotted. Upper part demonstrates no MLD, lower part MLD. MLD: multilineage dysplasia.

### 8. Overall survival analyses

We addressed the prognostic influences of all analyzed clinical and genetic markers within the *RUNX1* mutated AML cohort by Kaplan-Meier analyses. The median follow up of the total cohort was 25.5 months. MLD, additional mutations  $\geq 3$ , mutations in at least one of the spliceosomal genes, *DNMT3A*, *NRAS*, and *U2AF1* turned out to adversely affect overall survival. However, in multivariate Cox regression analysis, only  $\geq 3$  mutations retained the independent adverse prognostic influence. The Kaplan-Meier plots are shown in Figure S2.

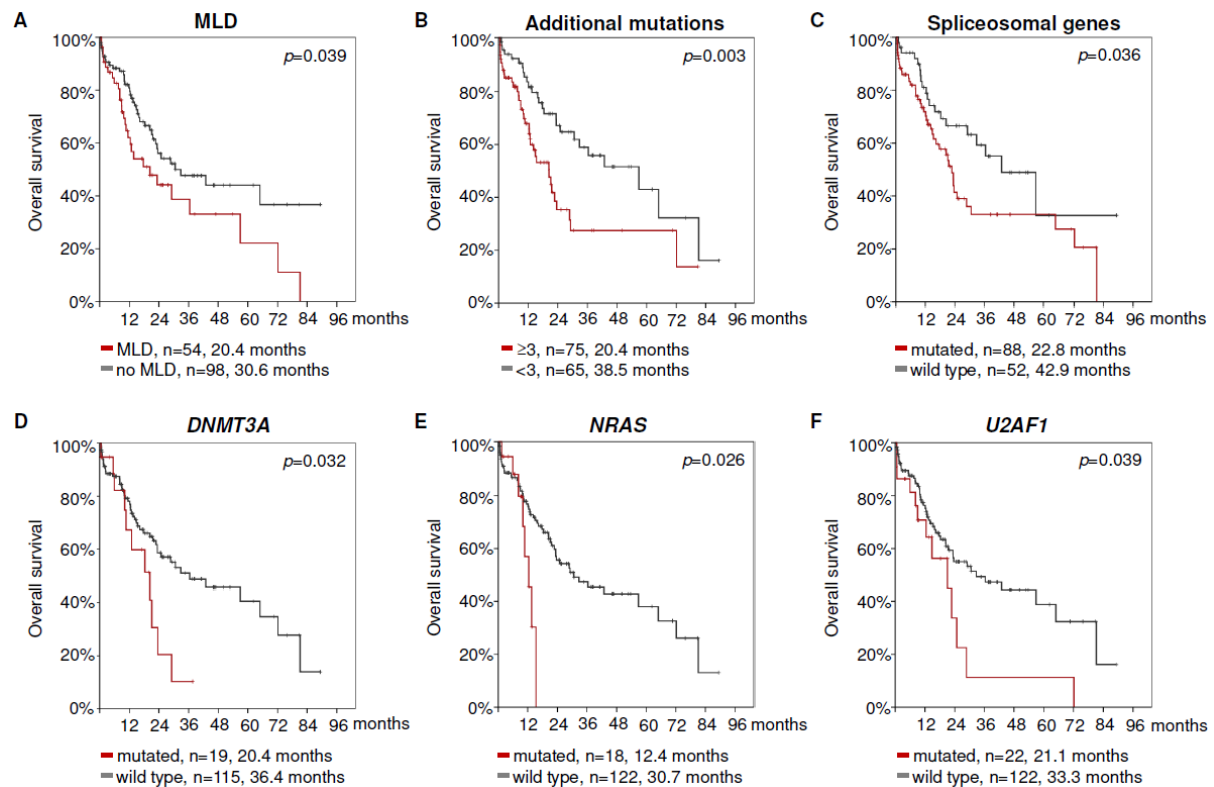

**Figure S2.** Overall survival analyses of different clinical markers. The case numbers and median overall survival are given beneath the Kaplan-Meier plots, respectively. Significant  $p$ -values are given. A) MLD vs no MLD. B) Additional gene mutations  $\geq 3$  vs  $< 3$ . C) Mutation in at least one spliceosomal gene vs no mutation in any spliceosomal gene. D) *DNMT3A* mutated vs wild type. E) *NRAS* mutated vs wild type. F) *U2AF1* mutated vs wild type. MLD: multilineage dysplasia.

## 9. References

- 1 Goasguen JE, Matsuo T, Cox C, Bennett JM. Evaluation of the dysmyelopoiesis in 336 patients with de novo acute myeloid leukemia: Major importance of dysgranulopoiesis for remission and survival. *Leukemia* 1992; **6**: 520-525.
- 2 Swerdlow SH, Campo E, Harris NL, Jaffe ES, Pileri SA, Stein H, et al. WHO Classification of Tumours of Haematopoietic and Lymphoid Tissues. 4th ed. Lyon: International Agency for Research on Cancer (IARC); 2008.
- 3 Arber DA, Orazi A, Hasserjian R, Thiele J, Borowitz MJ, Le Beau MM, et al. The 2016 revision to the World Health Organization (WHO) classification of myeloid neoplasms and acute leukemia. *Blood* 2016.
- 4 Weisser M, Kern W, Schoch C, Hiddemann W, Haferlach T, Schnittger S. Risk assessment by monitoring expression levels of partial tandem duplications in the *MLL* gene in acute myeloid leukemia during therapy. *Haematologica* 2005; **90**: 881-889.

- 5 Schnittger S, Schoch C, Dugas M, Kern W, Staib P, Wuchter C, et al. Analysis of FLT3 length mutations in 1003 patients with acute myeloid leukemia: correlation to cytogenetics, FAB subtype, and prognosis in the AMLCG study and usefulness as a marker for the detection of minimal residual disease. *Blood* 2002; **100**: 59-66.
- 6 Grimwade D, Hills RK, Moorman AV, Walker H, Chatters S, Goldstone AH, et al. Refinement of cytogenetic classification in acute myeloid leukemia: determination of prognostic significance of rare recurring chromosomal abnormalities among 5876 younger adult patients treated in the United Kingdom Medical Research Council trials. *Blood* 2010; **116**: 354-365.
- 7 Bennett JM, Catovsky D, Daniel MT, Flandrin G, Galton DA, Gralnick HR, et al. Proposed revised criteria for the classification of acute myeloid leukemia. A report of the French-American-British Cooperative Group. *Ann Intern Med* 1985; **103**: 620-625.
- 8 Haferlach T, Schoch C, Löffler H, Gassmann W, Kern W, Schnittger S, et al. Morphologic dysplasia in de novo acute myeloid leukemia (AML) is related to unfavorable cytogenetics but has no independent prognostic relevance under the conditions of intensive induction therapy: results of a multiparameter analysis from the German AML Cooperative Group studies. *J Clin Oncol* 2003; **21**: 256-265.
- 9 Miesner M, Haferlach C, Bacher U, Weiss T, Maciejewski K, Kohlmann A, et al. Multilineage dysplasia (MLD) in acute myeloid leukemia (AML) correlates with MDS-related cytogenetic abnormalities and a prior history of MDS or MDS/MPN but has no independent prognostic relevance: a comparison of 408 cases classified as "AML not otherwise specified" (AML-NOS) or "AML with myelodysplasia-related changes" (AML-MRC). *Blood* 2010; **116**: 2742-2751.
- 10 Wandt H, Schakel U, Kroschinsky F, Prange-Krex G, Mohr B, Thiede C, et al. MLD according to the WHO classification in AML has no correlation with age and no independent prognostic relevance as analyzed in 1766 patients. *Blood* 2008; **111**: 1855-1861.
- 11 Bacher U, Schnittger S, Maciejewski K, Grossmann V, Kohlmann A, Alpermann T, et al. Multilineage dysplasia does not influence prognosis in CEBPA-mutated AML, supporting the WHO proposal to classify these patients as a unique entity. *Blood* 2012; **119**: 4719-4722.
- 12 Falini B, Maciejewski K, Weiss T, Bacher U, Schnittger S, Kern W, et al. Multilineage dysplasia has no impact on biologic, clinicopathologic, and prognostic features of AML with mutated nucleophosmin (NPM1). *Blood* 2010; **115**: 3776-3786.
